# Supplementary material for: Effect of Soil Environment on Species Diversity of Desert Plant Communities
Source: MDPI journal article supplement (doi:10.3390/plants12193465), 2023-10-02
Supplement: s1 [file s1]

Table S1. Plant Species in Alxa Desert

| Serial Number | Families       | Genera          | Species                                |
|---------------|----------------|-----------------|----------------------------------------|
| 1             | Plumbaginaceae | Limonium Mill.  | Limonium aureum (L.) Hill              |
| 2             |                | Limonium Mill.  | Limonium aureum                        |
| 3             | Liliaceae      | Allium          | Allium mongolicum regel                |
| 4             |                | Allium          | Allium polyrhizum turcz. Ex Regel      |
| 5             |                | Allium          | Allium condensatum                     |
| 6             |                | Asparagus       | Asparagus gobicus Ivan. ex Grubov      |
| 7             | Primulaceae    | Glaux           | Glaux maritima L                       |
| 8             | Tamaricaceae   | Reaumuria       | Reaumuria soongarica                   |
| 9             |                | Tamaricaceae    | Tamarix chinensis Lour.                |
| 10            | Labiatae       | Panzeria Moench | Panzeria alaschanica kupr              |
| 11            | Leguminosae    | Astragalus      | Astragalus linn                        |
| 12            |                | Astragalus      | Astragalus complanatus                 |
| 13            |                | Glycyrrhiza     | Glycyrrhiza uralensis Fisch            |
| 14            |                | Astragalus      | Astragalus membranaceus (Fisch.) bunge |
| 15            |                | Oxytropis       | Oxytropis glabra DC                    |
| 16            |                | Caragana        | Caragana korshinskii Kom.              |
| 17            |                | Astragalus      | Astragalus alashan variant             |
| 18            |                | Astragalus      | Astragalus adsurgens Pall.             |
| 19            |                | Astragalus      | Astragalus alxanensis                  |
| 20            |                | Oxytropis       | Oxytropis aciphylla Ledeb              |
| 21            |                | Ammopiptanthus  | Ammopiptanthus mongolicus              |
| 22            |                | Sophora         | Sophora alopecuroides L.               |
| 23            |                | Astragalus      | Astragalus sulcatus Linn               |

|    |         |                          |                                             |
|----|---------|--------------------------|---------------------------------------------|
| 24 |         | Astragalus               | Astragalus mongholicus Bunge                |
| 25 |         | Astragalus               | Astragalus variabilis Bunge ex Maxim        |
| 26 |         | Hedysarum                | Hedysarum scoparium Fisch. & C. A. Mey.     |
| 27 |         | Thermopsis               | Thermopsis lanceolata                       |
| 28 |         | Oxytropis                | Oxytropis glabra DC                         |
| 29 |         | Caragana                 | Caragana stenophylla Pojark                 |
| 30 | Poaceae | Phragmites               | Phragmites australis (Cav.) Trin. ex Steud. |
| 31 |         | Psammochloa              | Psammochloa villosa (Trin.) Bor             |
| 32 |         | Leymus                   | Leymus secalenus (Georgi) Tzrek             |
| 33 |         | Festuca                  | Festuca ovina L                             |
| 34 |         | Stipa                    | Stipa capillata L                           |
| 35 |         | Achnatherum              | Achnatherum splendens                       |
| 36 |         | Agropyron                | Agropyron cristatum (L.) Gaertn             |
| 37 |         | <b>Cleistogenes Keng</b> | Cleistogenes Keng                           |
| 38 |         | Eragrostis               | Eragrostis pilosa (L.) Beauv.               |
| 39 |         | Stipa                    | Stipa Linn                                  |
| 40 |         | Stipa                    | Stipa Linn.                                 |
| 41 |         | Cleistogenes             | Cls                                         |
| 42 |         | Enneapogon               | enneapogon borealis (Griseb.) Honda         |
| 43 |         | Stipa                    | Stipa breviflora Griseb                     |
| 44 |         | Aristida                 | Aristida adscensionis L                     |
| 45 |         | Stipa                    | Stipa glareosa P.A. Smirn.                  |
| 46 |         | Blysmus                  | Brylkinia caudata                           |
| 47 |         | Puccinellia              | Puccinellia tenuiflora (Griseb.) Scribn     |
| 48 |         | Pennisetum               | Pennisetum centrasiatricum Tzvel            |
| 49 |         | Chloris                  | Chloris virgata Sw                          |

|    |                |               |                                             |
|----|----------------|---------------|---------------------------------------------|
| 50 |                | Calamagrostis | Calamagrostis epigeios (L.) Roth            |
| 51 |                | Phragmites    | Phragmites australis (Cav.) Trin. ex Steud. |
| 52 |                | Setaria       | Setaria viridis (L.) P. Beauv               |
| 53 |                | Stipa         | Stipa tianschanica Roshev                   |
| 54 | Elaeagnaceae   | Elaeagnus     | Elaeagnus angustifolia                      |
| 55 | Zygophyllaceae | Nitraria      | Nitraria tangutorum Bobrov                  |
| 56 |                | Sarcozygium   | Sarcozygium xanthoxylon Bunge               |
| 57 |                | Tribulus      | Tribulus terrestris L.                      |
| 58 |                | Peganum       | Peganum harmala L.                          |
| 59 |                | Nitraria      | Nitraria sphaerocarpa Maxim.                |
| 60 |                | Peganum       | Peganum nigellastrum Bunge                  |
| 61 |                | Zygophyllum   | Zygophyllum fabago                          |
| 62 |                | Nitraria      | Nitraria tangutorum Bobrov                  |
| 63 |                | Zygophyllum   | Zygophyllum mucronatum                      |
| 64 |                | Zygophyllum   | Zygophyllum potaninii                       |
| 65 | Apocynaceae    | Apocynum      | Apocynum venetum                            |
| 66 |                | Cynanchum     | Cynanchum cathayense                        |
| 67 |                | Poacynum      | Poacynum hendersonii                        |
| 68 |                | Poacynum      | Poacynum pictum (Schrenk) Baill             |
| 69 | Compositae     | Stilpnolepis  | Stilpnolepis centiflora                     |
| 70 |                | Artemisia     | Artemisia arenaria                          |
| 71 |                | Artemisia     | Artemisia sacrorum                          |
| 72 |                | Sonchus       | Sonchus oleraceus L                         |
| 73 |                | Taraxacum     | Taraxacum mongolicum                        |
| 74 |                | Heteropappus  | Heteropappus hispidus                       |
| 75 |                | Acroptilon    | Acroptilon repens (L.) DC.                  |

|     |  |               |                                               |
|-----|--|---------------|-----------------------------------------------|
| 76  |  | Ajania        | Ajania fruticulosa                            |
| 77  |  | Scorzonera    | Scorzonera austriaca Willd                    |
| 78  |  | Ajania        | Ajania pallasiana (Fisch. ex Bess.) Poljak    |
| 79  |  | Cirsium       | Cirsium Mill. emend. Scop                     |
| 80  |  | Carduus       | Carduus crispus L.                            |
| 81  |  | Echinops      | Echinops gmelinii Turcz.                      |
| 82  |  | Scorzonera    | Scorzonera mongolica Maxim                    |
| 83  |  | Inula         | Inula salsoloides (Turcz. ) Ostenf            |
| 84  |  | Artemisia     | Artemisia vestita Wall                        |
| 85  |  | Asterothamnus | Asterothamnus centrali-asiaticus<br>Novopokr. |
| 86  |  | Artemisia     | Artemisia ordosica Krasch                     |
| 87  |  | Artemisia     | Artemisiadalai-lamaeKrasch                    |
| 88  |  | Mulgedium     | Mulgedium tataricum                           |
| 89  |  | Saussurea     | Saussurea japonica                            |
| 90  |  | Artemisia     | Artemisia salsoloides                         |
| 91  |  | Taraxacum     | Taraxacum sinicum                             |
| 92  |  | Saussurea     | Saussurea runcinata DC                        |
| 93  |  | Youngia       | Youngia tenuicaulis                           |
| 94  |  | Artemisia     | Artemisia xerophytica Krasch.                 |
| 95  |  | Ixeris        | Ixeris denticulata                            |
| 96  |  | Ajania        | Ajania tenuifolia (Jacquem.) Tzvel.           |
| 97  |  | Scorzonera    | ScorzoneradivaricataTurcz.                    |
| 98  |  | Neopallasia   | Neopallasia pectinata                         |
| 99  |  | Ixeridium     | Ixeridium sonchifolium (Maxim.) Shih          |
| 100 |  | Cichorium     | Cichorium intybus L                           |

|     |                |                   |                                                                |
|-----|----------------|-------------------|----------------------------------------------------------------|
| 101 |                | Cirsium           | Cirsium setosum                                                |
| 102 |                | Heteropappus      | Heteropappus altaicus (Willd) Novopokr                         |
| 103 |                | Ajania            | Ajania achilloides(Turcz.)                                     |
| 104 |                | Sonchus           | Sonchus arvensis L                                             |
| 105 |                | Artemisia         | Artemisia blepharolepis Bunge                                  |
| 106 |                | Artemisia         | Artemisia scoparia Waldst. et Kit                              |
| 107 |                | Artemisia         | Artemisia Linn. Senu stricto, excl. Sect.<br>Seriphidium Bess. |
| 108 |                | Olgaea            | Olgaea leucophylla                                             |
| 109 | Chenopodiaceae | Corispermum       | Corispermum patelliforme Iljin                                 |
| 110 |                | Bassia            | Bassia dasphylla                                               |
| 111 |                | Agriophyllum      | Kirilowia eriantha Bunge                                       |
| 112 |                | Salsola           | Salsola ruthenica Iljin                                        |
| 113 |                | Agriophyllum      | Agriophyllum squarrosum (L.) Moq.                              |
| 114 |                | Suaeda            | Suaeda salsa                                                   |
| 115 |                | Haloxyton         | Haloxyton ammodendron (C. A. Mey.)<br>Bunge ex Fenzl           |
| 116 |                | Salsola/Halogeton | Halogeton arachnoideus Moq                                     |
| 117 |                | Salsola           | Salsola arbuscula Pall                                         |
| 118 |                | Salsola           | Salsola collina                                                |
| 119 |                | Kalidium          | Kalidium foliatum                                              |
| 120 |                | Kalidium          | Corispermum mongolicum Iliin                                   |
| 121 |                | Salsola           | Salsola passerina Bunge                                        |
| 122 |                | Kalidium          | Kalidium cuspidatum (Ung.-Sternb.)<br>Grubov                   |
| 123 |                | Halogeton         | Halogeton glomeratus (M. Bieb.) Ledeb.                         |
| 124 |                | Ceratoides        | Ceratoides latens (J. F. Gmel.) Reveal &<br>N. H. Holmgren     |
| 125 |                | Salsola           | Salsola laricifolia Turcz. ex Litv                             |
| 126 |                | Cornulaca         | Cornulaca alaschanica C. P. Tsien & G. L.<br>Chu               |

|     |                |                     |                                                                    |
|-----|----------------|---------------------|--------------------------------------------------------------------|
| 127 |                | Sympegma            | Sympegma regelii Bunge                                             |
| 128 |                | Anabasis            | Anabasis brevifolia C. A. Mey                                      |
| 129 |                | Suaeda              | Suaeda glauca (Bunge) Bunge                                        |
| 130 |                | Suaeda              | Suaeda crassifolia Pall.                                           |
| 131 |                | Suaeda              | Suaeda corniculata Bunge                                           |
| 132 |                | Kochia              | Kochia scoparia (L.) Schrad                                        |
| 133 |                | Kalidium            | Slenderbranch Kalidium                                             |
| 134 |                | Suaeda              | Suaeda przewalskii                                                 |
| 135 |                | Suaeda              | Suaeda glauca Bunge                                                |
| 136 |                | Kalidium            | Kalidium cuspidatum (Ung.-Sternb.)<br>Grubov var. sinicum A. J. Li |
| 137 |                | Kalidium            | Kalidium foliatum                                                  |
| 138 | Polygonaceae   | Atraphaxis          | Atraphaxis bracteata Losinsk                                       |
| 139 |                | Calligonum          | Calligonum mongolicum Turcz.                                       |
| 140 |                | Rheum               | Rheum palmatum L                                                   |
| 141 |                | Calligonum          | Calligonum mongolicum                                              |
| 142 |                | Atraphaxis          | Atraphaxis frutescens                                              |
| 143 | Asclepiadaceae | Cynanchum           | Cynanchum hancockianum                                             |
| 144 |                | Cynanchum           | Cynanchum thesioides (Freyn) K. Schum                              |
| 145 |                | Cynanchum           | Cynanchum chinense R. Br.                                          |
| 146 |                | Periploca           | Periploca sepium                                                   |
| 147 | Ephedraceae    | Ephedra             | Ephedra sinica Stapf                                               |
| 148 |                | Ephedra             | Ephedra intermedin Schrenk                                         |
| 149 |                | Ephedra             | Ephedra przewalskii Stapf                                          |
|     | Verbenaaceae   | Caryopteris         | Caryopteris mongholica Bunge                                       |
| 151 |                | Verbena officinalis | Verbena officinalis L                                              |
| 152 | Geraniaceae    | Erodium             | Erodium stephanianum Willd.                                        |

|     |                 |             |                                     |
|-----|-----------------|-------------|-------------------------------------|
| 153 | Casuarinaceae   | Halerpestes | Halerpestes ruthenica (Jacq.) Ovcz  |
| 154 | Ephedraceae     | Halerpestes | Casuarina equisetifolia Forst       |
| 155 | Cyperaceae      | Casuarina   | Carex enervis C. A. Mey.            |
| 156 | Vitaceae        | Euphorbia   | Parthenocissus tricuspidata         |
| 157 | Rosaceae        | Potaninia   | Potaninia mongolica Maxim           |
| 158 |                 | Amygdalus   | Amygdalus mongolica (Maxim.) Ricker |
| 159 | Solanaceae      | Lycium      | Lycium ruthenicum Murray            |
| 160 |                 | Lycium      | Lycium barbarum L                   |
| 161 | Umbelliferae    | Ferula      | Ferula teterrima H. Karst. & Kir.   |
| 162 | Cyperaceae      | Carex       | Carex appendiculata                 |
| 163 |                 | Carex       | Carex spp                           |
| 164 |                 | Carex       | Carex duriuscula                    |
| 165 | Cruciferae      | Pugionium   | Pugionium cornutum (L.) Gaertn.     |
| 166 | Caryophyllaceae | Dianthus    | Caryophyllaceae                     |
| 167 |                 | Gymnocarpos | Gymnocarpos przewalskii             |
| 168 | Juncaginaceae   | Triglochin  | Triglochin palustre                 |
| 169 | Asparagaceae    | Asparagus   | Asparagus cochinchinensis (Lour.)   |
| 170 | Convolvulaceae  | Convolvulu  | Convolvulus gortschakovii Schrenk   |
| 171 |                 | Convolvulu  | Convolvulus tragacanthoides Turcz   |
| 172 | Salicaceae      | Populus     | Populus euphratica                  |
| 173 |                 | Populus     | Populus simonii Carr                |
| 174 |                 | Salix       | Salix matsudana Koidz               |
| 175 |                 | Populus     |                                     |
| 176 | Rosaceae        | Hypecoum    | Hypecoum L                          |
| 177 | Ulmaceae        | Ulmus       | Ulmus pumila L                      |

|     |              |              |                                                 |
|-----|--------------|--------------|-------------------------------------------------|
| 178 | Iridaceae    | Iris         | Iris lactea Pall. var. chinensis (Fisch.) Koidz |
| 179 |              | Iris         | Iris tenuifolia Pall                            |
| 180 | Boraginaceae | Arnebia      | Arnebia Forsk.                                  |
| 181 |              | Arnebia      | Arnebia fimbriata                               |
| 182 |              | Tournefortia | Tournefortia sibirica                           |
| 183 | Bignoniaceae | Incarvillea  | Incarvillea sinensis Lam                        |
